# Supplementary material for: Stability of Leaf Yerba Mate (Ilex paraguariensis) Metabolite Concentrations over the Time from the Prism of Secondary Sexual Dimorphism
Source: MDPI journal article supplement (doi:10.3390/plants12112199), 2023-06-02
Supplement: s1 [file s1]

# Stability of Leaf Yerba Mate (*Ilex paraguariensis*) Metabolite Concentrations over the Time from the Prism of Secondary Sexual Dimorphism

Miroslava Rakocevic <sup>1,2,\*</sup>, Aline de Holanda Nunes Maia <sup>2</sup>, Marcus Vinicius de Liz <sup>3</sup>, Rafaela Imoski <sup>3</sup>, Cristiane Vieira Helm <sup>1</sup>, Euclides Lara Cardozo Junior <sup>4</sup> and Ivar Wendling <sup>1</sup>

<sup>1</sup> The Laboratory of Plant Breeding, Embrapa Florestas, Colombo 83411-000, PR, Brazil

<sup>2</sup> Statistical Research Group, Embrapa Meio Ambiente, Jaguariúna 13918-110, SP, Brazil

<sup>3</sup> Research Group on Water and Wastewater Advanced Treatment Technologies, Department of Chemistry and Biology, Federal University of Technology-Paraná, Curitiba 81280-340, PR, Brazil

<sup>4</sup> Department of Pharmacy, UNIPAR, Paranaense University, Toledo 85903-170, PR, Brazil

\* Correspondence: mima.rakocevic61@gmail.com; Tel.: +55-19-97161-8918

**Table S1.** The influence of progeny, gender, and their interaction on the contents of theobromine, caffeine, chlorogenic and caffeic acids (% w/w) in leaves of yerba-mate plants, as measured by ANOVA's F-test *p*-values. Plants were originated from four provenances, with leaf collections performed in three phenophases, at 12, 18 and 24 months after the pruning, corresponding to the first winter (WinP-12), summer (SumP-18), and second winter growth pause (WinP-24).

| Phenophase | Provenance        | Source      | Nominal significance levels ( <i>p</i> -values) |                   |                  |                  |
|------------|-------------------|-------------|-------------------------------------------------|-------------------|------------------|------------------|
|            |                   |             | Theobromine                                     | Caffeine          | Chlorogenic acid | Caffeic acid     |
| WinP-12    | Ivaí              | Progeny (P) | 0.4229 ns                                       | <b>0.0008</b> *** | <b>0.0410</b> *  | 0.2489 ns        |
|            |                   | Gender (G)  | 0.1277 ns                                       | 0.8410 ns         | 0.8088 ns        | 0.6028 ns        |
|            |                   | P x G       | 0.7715 ns                                       | 0.4513 ns         | 0.1181 ns        | 0.6827 ns        |
|            | Barão de Cotegipe | Progeny (P) | <b>0.0002</b>                                   | <b>0.0016</b> **  | 0.8354 ns        | 0.5377           |
|            |                   | Gender (G)  | 0.6830                                          | 0.1506 ns         | <b>0.0604</b> .  | 0.7353           |
|            |                   | P x G       | <b>0.0005</b> ***                               | 0.1594 ns         | 0.5343 ns        | <b>0.0447</b> *  |
|            | Quedas do Iguaçu  | Progeny (P) | <b>0.0191</b>                                   | <b>0.0586</b>     | 0.8988 ns        | 0.3511           |
|            |                   | Gender (G)  | 0.3394                                          | 0.4469            | 0.4673 ns        | 0.2149           |
|            |                   | P x G       | <b>0.0234</b> *                                 | <b>0.0233</b> *   | 0.3728 ns        | <b>0.0337</b> *  |
|            | Cascavel          | Progeny (P) | 0.6935 ns                                       | <b>0.0855</b> .   | 0.7041 ns        | 0.5122 ns        |
|            |                   | Gender (G)  | 0.6717 ns                                       | 0.5653 ns         | 0.6415 ns        | 0.8112 ns        |
|            |                   | P x G       | 0.9013 ns                                       | 0.7763 ns         | 0.1009 ns        | 0.3718 ns        |
| SumP-18    | Ivaí              | Progeny (P) | 0.3960 ns                                       | <b>0.0109</b> *   | 0.3219 ns        | 0.2729 ns        |
|            |                   | Gender (G)  | 0.4457 ns                                       | 0.6466 ns         | 0.8182 ns        | 0.2765 ns        |
|            |                   | P x G       | 0.3327 ns                                       | 0.3264 ns         | 0.4143 ns        | 0.2077 ns        |
|            | Barão de Cotegipe | Progeny (P) | 0.4583 ns                                       | 0.1077 ns         | <b>0.0773</b> .  | <b>0.0011</b> ** |
|            |                   | Gender (G)  | 0.7044 ns                                       | 0.2355 ns         | 0.3830 ns        | 0.5286 ns        |
|            |                   | P x G       | 0.3423 ns                                       | 0.5414 ns         | 0.2763 ns        | 0.1154 ns        |
|            | Quedas do Iguaçu  | Progeny (P) | 0.6916 ns                                       | 0.7744 ns         | 0.1618 ns        | <b>0.0591</b> .  |
|            |                   | Gender (G)  | 0.7152 ns                                       | 0.9508 ns         | 0.3919 ns        | <b>0.0096</b> ** |
|            |                   | P x G       | 0.5999 ns                                       | 0.4730 ns         | 0.6308 ns        | 0.6371 ns        |
|            | Cascavel          | Progeny (P) | <b>0.0087</b> **                                | 0.6089 ns         | <b>0.0181</b> *  | 0.5969 ns        |
|            |                   | Gender (G)  | 0.7088 ns                                       | 0.8189 ns         | 0.1184 ns        | 0.1354 ns        |
|            |                   | P x G       | 0.4693 ns                                       | 0.5739 ns         | 0.4907 ns        | 0.4576 ns        |
| WinP-24    | Ivaí              | Progeny (P) | <b>0.0030</b> **                                | <b>0.0001</b>     | <b>0.0899</b> .  | 0.1281 ns        |
|            |                   | Gender (G)  | 0.5108 ns                                       | 0.2675            | 0.6413 ns        | 0.6291 ns        |
|            |                   | P x G       | 0.8637 ns                                       | <b>0.0786</b> .   | 0.5765 ns        | 0.9704 ns        |
|            | Barão de Cotegipe | Progeny (P) | <b>0.0906</b> .                                 | <b>0.0564</b> .   | <b>0.0147</b>    | 0.1712 ns        |
|            |                   | Gender (G)  | 0.4836 ns                                       | 0.2246 ns         | <b>0.0208</b>    | 0.4359 ns        |
|            |                   | P x G       | 0.8132 ns                                       | 0.2869 ns         | <b>0.0940</b> .  | 0.9985 ns        |
|            | Quedas do Iguaçu  | Progeny (P) | <b>0.0599</b> .                                 | 0.4052 ns         | 0.3118 ns        | 0.7744 ns        |
|            |                   | Gender (G)  | 0.8050 ns                                       | 0.2494 ns         | 0.5451 ns        | 0.8850 ns        |
|            |                   | P x G       | 0.5277 ns                                       | 0.3206 ns         | 0.2995 ns        | 0.9229 ns        |
|            | Cascavel          | Progeny (P) | <b>0.0318</b>                                   | 0.2233 ns         | 0.3008 ns        | 0.9269 ns        |
|            |                   | Gender (G)  | 0.2003                                          | 0.4407 ns         | 0.9638 ns        | 0.7437 ns        |
|            |                   | P x G       | <b>0.0610</b> .                                 | 0.8191 ns         | 0.2881 ns        | 0.8538 ns        |

Significance levels (\*\*\*<0.001, \*\*<0.01, \*<0.05, .<0.10) are also indicated. F-test *p*-values corresponding to ANOVA's factors significant at 0.10 were highlighted in bold. Warning: whenever the P x G interaction was significant, the *p*-values associated with the principal factors (progeny or gender) were meaningless.
